# Supplementary material for: Comparative analysis of cobalt ferrite and iron oxide nanoparticles using bimodal hyperthermia, along with physical and in silico interaction with human hemoglobin
Source: Royal Society of Chemistry journal article supplement (doi:10.1039/d2tb02447k), 2023-01-01
Supplement: d2tb02447k1.pdf [file d2tb02447k1.pdf]

## ***Supporting Information (SI)***

### **Comparative analysis of cobalt ferrite and iron oxide nanoparticles using bimodal hyperthermia, along with photophysical and *in-silico* interaction with human hemoglobin**

Kritika<sup>a</sup>, Megha Pant<sup>b</sup>, Monika Yadav<sup>c</sup>, Anita Kamra Verma<sup>c</sup>, Ajit K. Mahapatro<sup>b</sup>,  
Indrajit Roy<sup>\*a</sup>

<sup>a</sup> *Department of Chemistry, University of Delhi, Delhi-110007. India.*

<sup>b</sup> *Department of Physics and Astrophysics, University of Delhi, Delhi-110007. India.*

<sup>c</sup> *Department of Zoology, Kirori Mal College, University of Delhi, Delhi-110007, India.*

#### ***Correspondence***

*\*Professor Indrajit Roy*

*Professor*

*Department of Chemistry*

*University of Delhi, Delhi-110007. India.*

Email: [indrajitroy11@gmail.com](mailto:indrajitroy11@gmail.com)

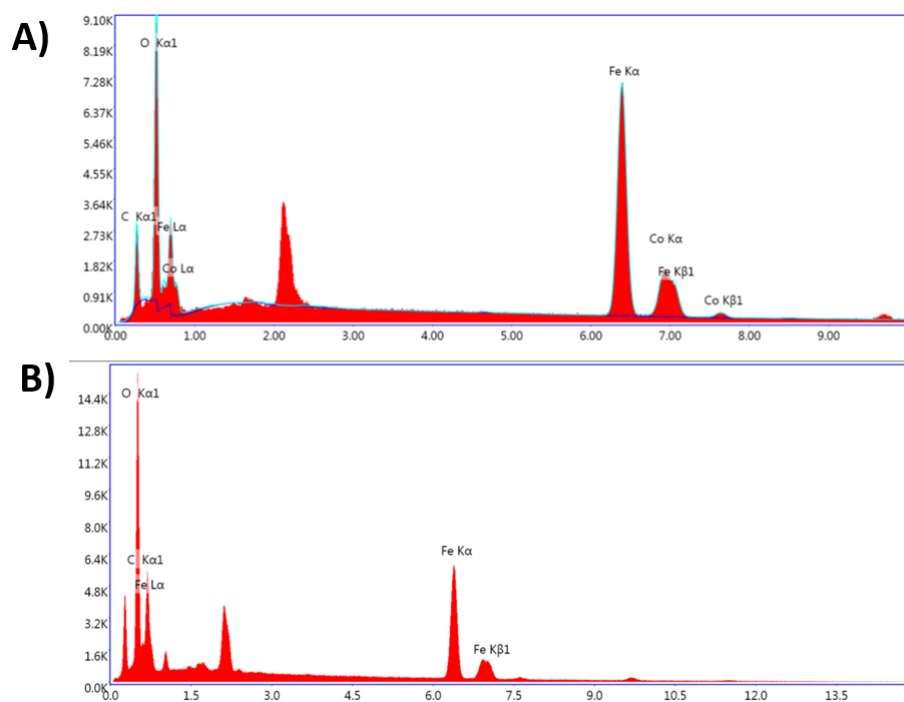

Figure S1: EDAX plot of A) PAA-CFNP B) PAA-IONP.

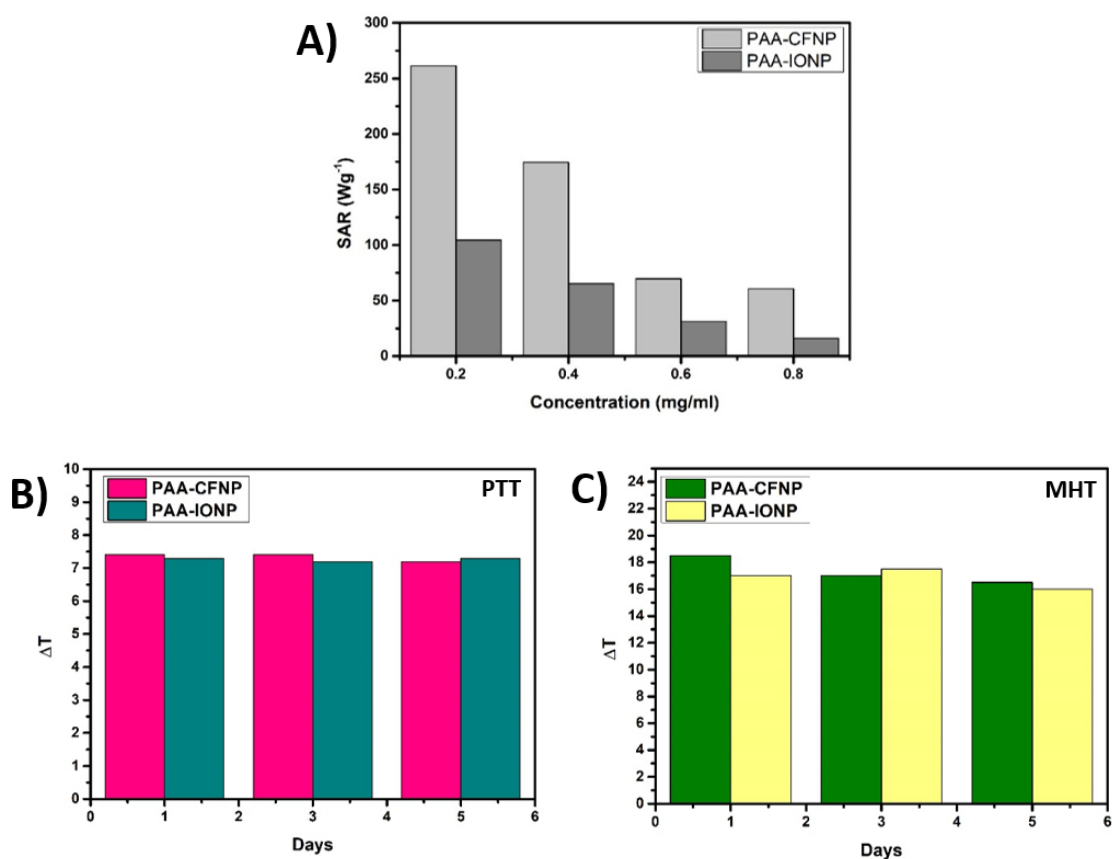

Figure S2: A) SAR plot of PAA-CFNP and PAA-IONP at different concentration. B) Reusability of PAA-CFNP and PAA-IONP as photothermal agents. C) Reusability of PAA-CFNP and PAA-IONP as magnetic hyperthermia agents.

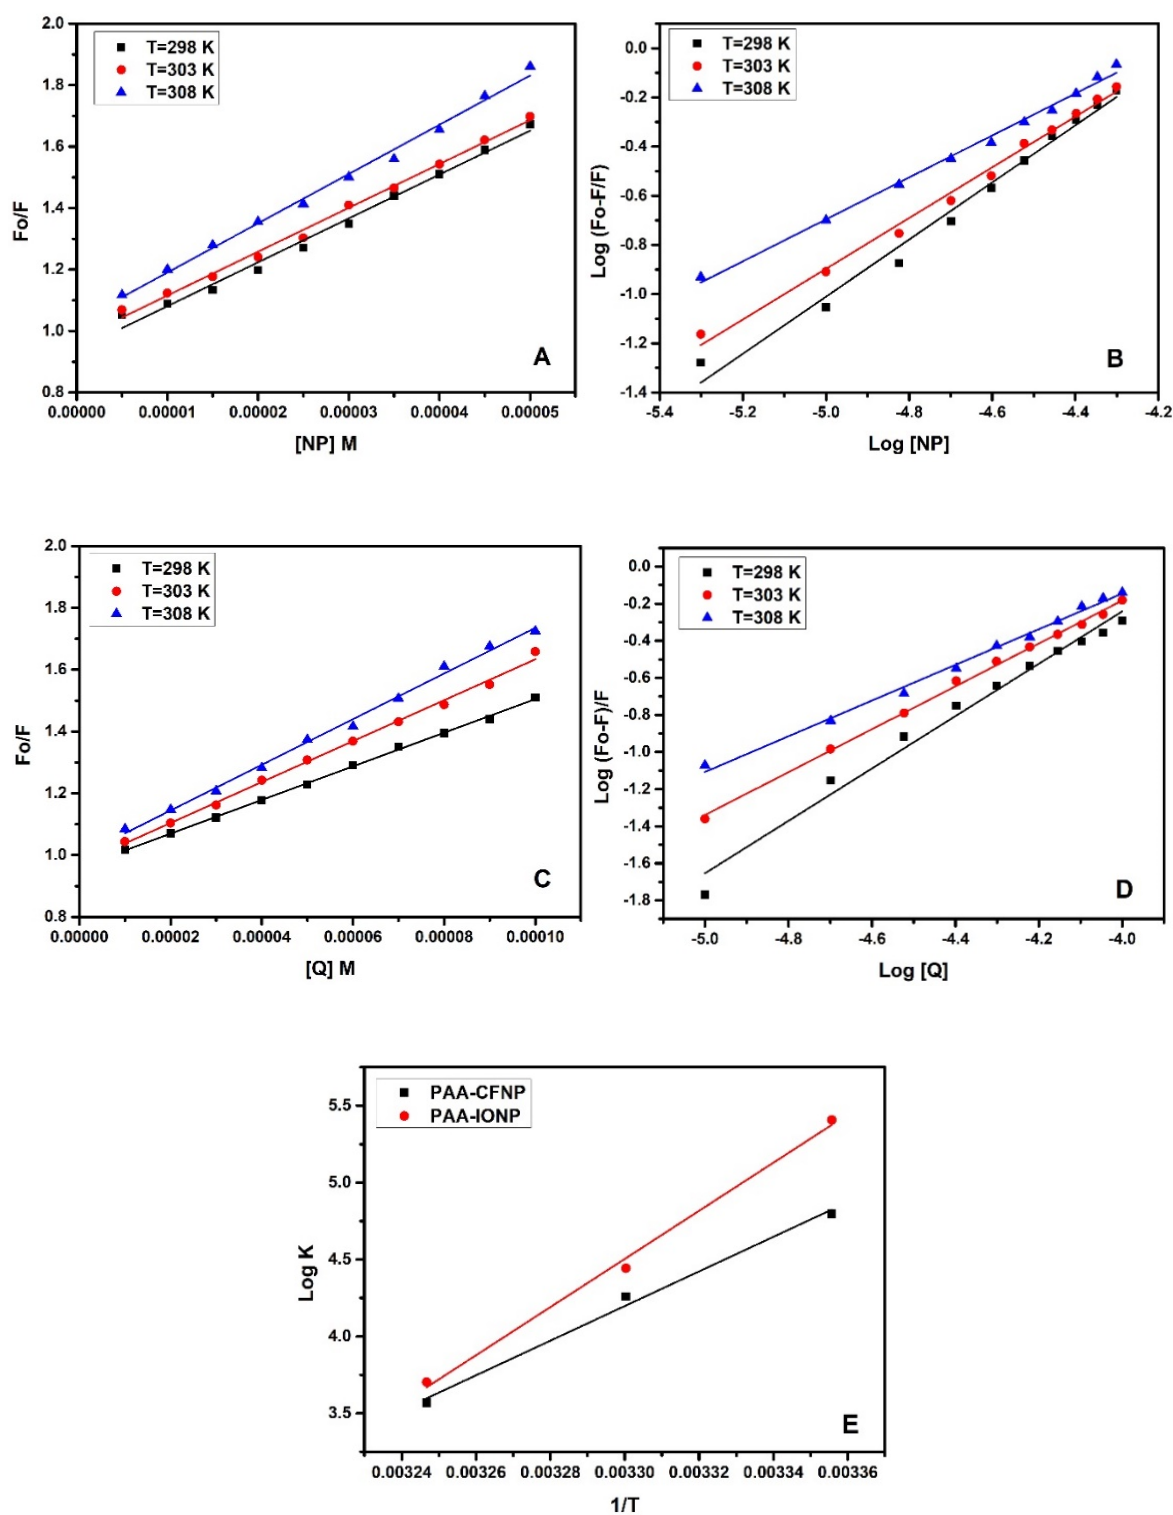

Figure S3: Stern Volmer plot of (Fo/F vs [NP]) for calculating quenching constant A) PAA-CFNP C) PAA-IONP. Modified Stern Volmer plot (Log Fo-F/F vs Log [NP]) for calculating Binding constant B) PAA-CFNP D) PAA-IONP. E) Van't Hoff plot (Log K vs 1/T) for calculating thermodynamic parameters.

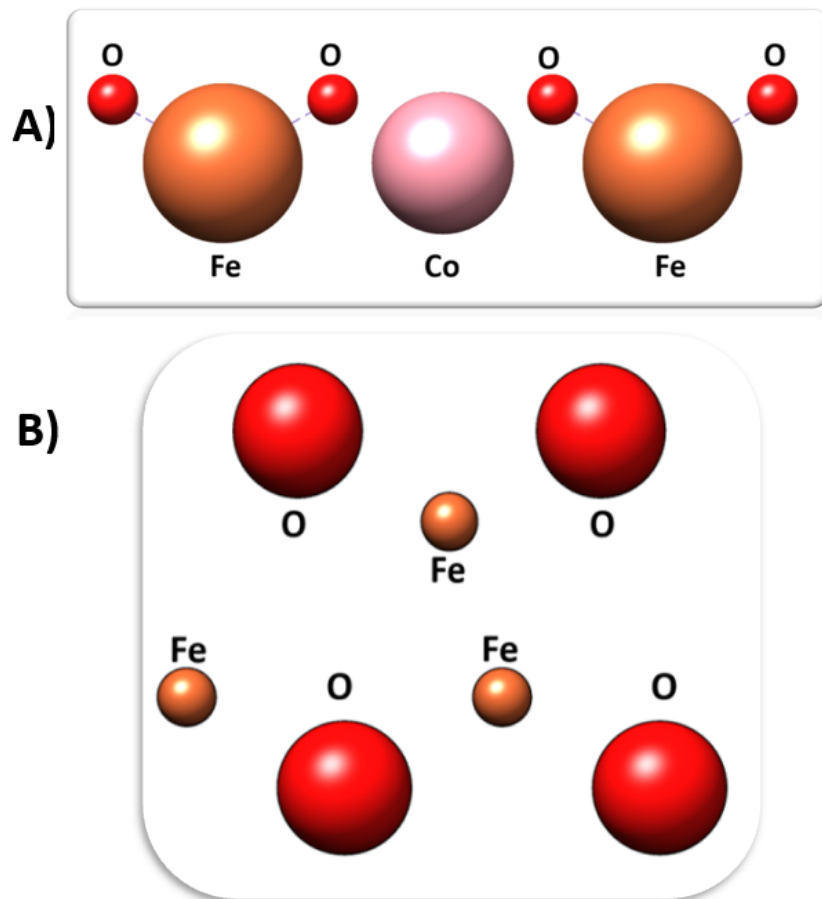

Figure S4: Structure depiction with all atoms labelled A) Cobalt ferrite B) Iron oxide.

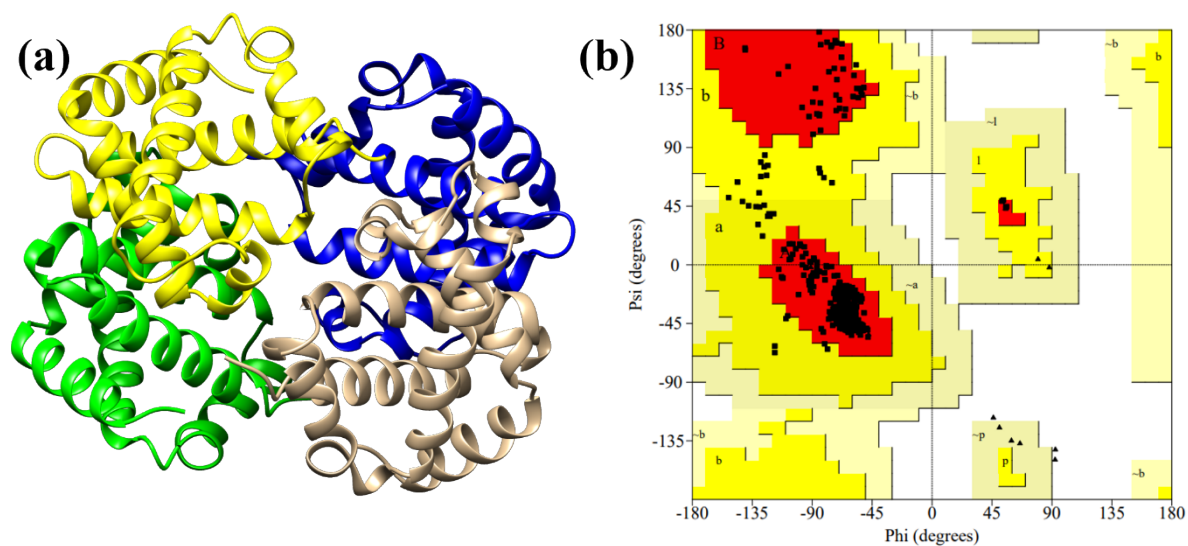

Figure S5: a) 3D structure of haemoglobin. b) Ramachandran plot analysis of 3D structure of haemoglobin.

|                                                    | Temperature (K) | PAA-CFNP                | PAA-IONP                |
|----------------------------------------------------|-----------------|-------------------------|-------------------------|
| <b>Stern Volmer Constant</b><br>$K_{sv} (M^{-1})$  | 298             | $1.4275 \times 10^4$    | $0.5437 \times 10^4$    |
|                                                    | 303             | $1.4364 \times 10^4$    | $0.6615 \times 10^4$    |
|                                                    | 308             | $1.6025 \times 10^4$    | $0.7382 \times 10^4$    |
| <b>Quenching Constant</b><br>$K_q (M^{-1} s^{-1})$ | 298             | $1.4275 \times 10^{12}$ | $0.5437 \times 10^{12}$ |
|                                                    | 303             | $1.4364 \times 10^{12}$ | $0.6615 \times 10^{12}$ |
|                                                    | 308             | $1.6025 \times 10^{12}$ | $0.7382 \times 10^{12}$ |
| <b>Binding constant</b><br>$K_b$                   | 298             | $0.62517 \times 10^5$   | $2.5537 \times 10^5$    |
|                                                    | 303             | $0.18142 \times 10^5$   | $0.2776 \times 10^5$    |
|                                                    | 308             | $0.03703 \times 10^5$   | $0.0504 \times 10^5$    |
| <b>Number of binding sites</b><br>$N$              | 298             | 1.1613                  | 1.4122                  |
|                                                    | 303             | 1.0312                  | 1.1567                  |
|                                                    | 308             | 0.8529                  | 0.9621                  |

**Table S1: Binding constants for interaction of Hb with PAA-CFNP and PAA-IONP at 298K, 303K and 308 K.**

| Nanoparticles | $\Delta G$ (kJ/mol) | $\Delta H$ (kJ/mol) | $T\Delta S$ (kJ/mol) |
|---------------|---------------------|---------------------|----------------------|
| PAA-CFNP      | -11.6986            | -93.539             | -81.890              |
| PAA-IONP      | -13.609             | -130.127            | -116.518             |

**Table S2: Thermodynamic parameters of interaction of Hb with PAA-CFNP and PAA-IONP.**

| Secondary structures | Details of secondary | Percentage content of |
|----------------------|----------------------|-----------------------|
|----------------------|----------------------|-----------------------|

|              | structures             | secondary structure |              |
|--------------|------------------------|---------------------|--------------|
|              |                        | Hb                  | 1:3 PAA-CFNP |
| Helix        | Helix 1 (Regular)      | 9.4                 | 2.7          |
|              | Helix 2 (Distorted)    | 6.3                 | 0.0          |
| Antiparallel | Anti 1 (Left-twisted)  | 2.8                 | 6.1          |
|              | Anti 2 (Relaxed)       | 10.4                | 17.8         |
|              | Anti 3 (Right twisted) | 14.5                | 17.1         |
| Parallel     |                        | 9.8                 | 0.0          |
| Turns        |                        | 13.7                | 14.5         |
| Others       |                        | 33.2                | 41.8         |

**Table S3: Percentage content of secondary structure of protein for Hb only and Hb with PAA-CFNP (1:3).**

| Secondary structures | Details of secondary structures | Percentage content of secondary structure |              |
|----------------------|---------------------------------|-------------------------------------------|--------------|
|                      |                                 | Hb                                        | 1:3 PAA-IONP |
| Helix                | Helix 1 (Regular)               | 10.2                                      | 2.9          |
|                      | Helix 2 (Distorted)             | 6.6                                       | 0.0          |
| Antiparallel         | Anti 1 (Left-twisted)           | 2.6                                       | 6.2          |
|                      | Anti 2 (Relaxed)                | 11.2                                      | 18.1         |
|                      | Anti 3 (Right twisted)          | 14.6                                      | 17.2         |
| Parallel             |                                 | 10.0                                      | 0.0          |
| Turns                |                                 | 14.0                                      | 14.6         |
| Others               |                                 | 30.6                                      | 41.0         |

**Table S4: Percentage content of secondary structure of protein for Hb only and Hb with PAA-IONP (1:3).**

| Index | Interactions             | Å                                                             |
|-------|--------------------------|---------------------------------------------------------------|
| 1.    | Hydrophobic interactions | 94C-ASP-2.59                                                  |
| 2.    | Hydrogen bonds           | 37B-TRP-3.43<br>94C-ASP-3.75<br>102B-ASN-2.65                 |
| 3.    | Hydrogen bonds           | 42C-TYR-3.25<br>92C-ARG-3.11<br>94C-ASP-3.33<br>102B-ASN-2.67 |

**Table S5: The molecular binding analysis of cobalt ferrite and haemoglobin interaction profiler evaluation**

#### **Calculations of photothermal efficiency (PCE)**

0.5 mg/ml of PAA-CFNP and PAA-IONP, were irradiated by 635 nm (350 mW) and 808 nm (1200 mW) laser until the steady state temperature reached. The diode laser was switched off and the solution was allowed to cool down. The following formula was used to calculate PCE ( $\eta$ ):

$$\eta = \frac{hS(T_{max} - T_{surr}) - Q_o}{I(1 - 10^{-A})} \quad (1)$$

where  $h$  is heat transfer coefficient,  $S$  is the surface area,  $T_{max}$  and  $T_{surr}$  are the maximum temperature and surrounding temperature respectively.  $Q_o$  and  $I$  are the heat absorbed by the tube and the laser power density, whereas the optical density of each material denoted by  $A$ . The value of  $hS$  can be obtained using equation (2)

$$hS = \frac{mD C_D}{\tau_s} \quad (2)$$

where  $m_D$  is mass and  $C_D$  is heat capacity of  $H_2O$  (4.2 J/g°C), while  $\tau_s$  is the heat dissipation time constant. It can be calculated using equation (3)

$$t = -\tau_s \ln \Theta = \tau_s \ln \frac{T - T_{surr}}{T_{max} - T_{surr}} \quad (3)$$

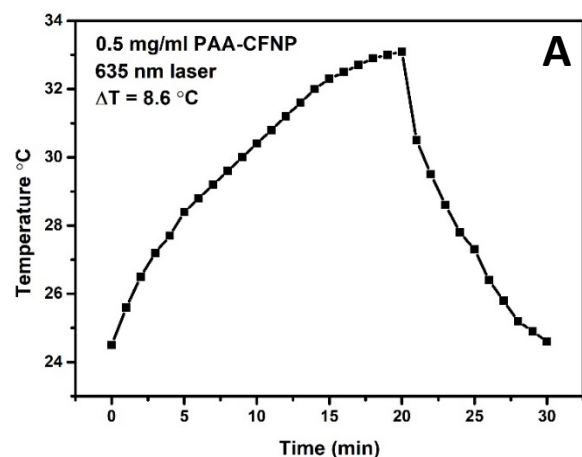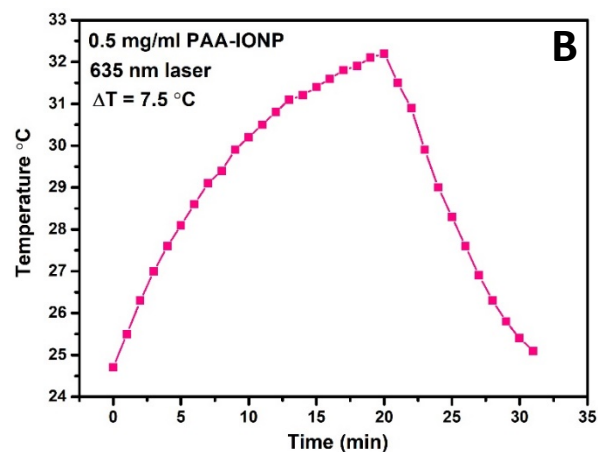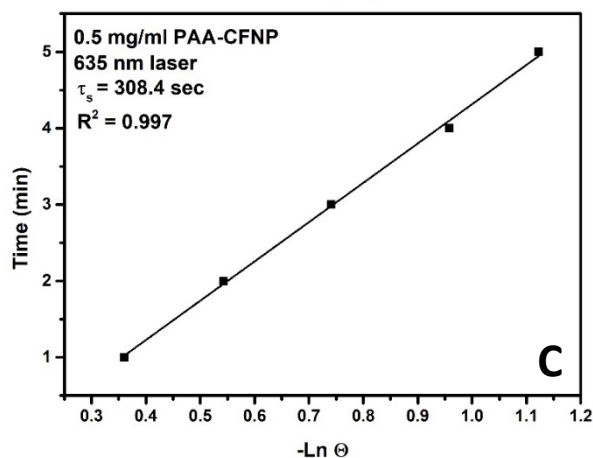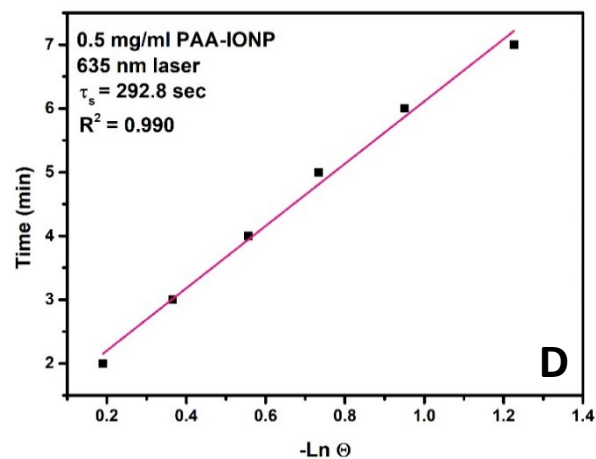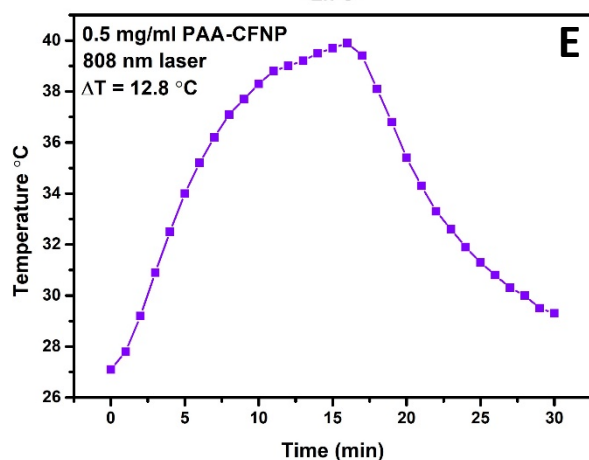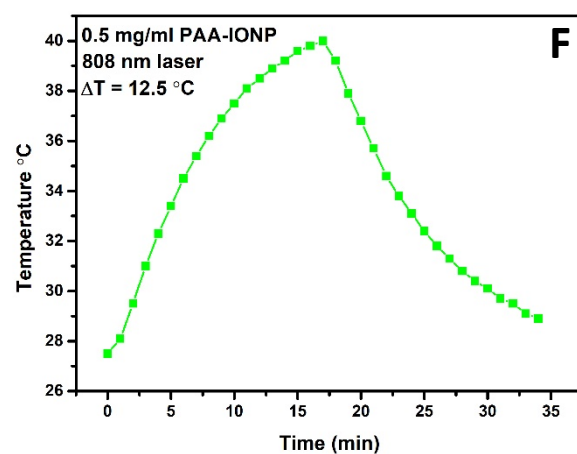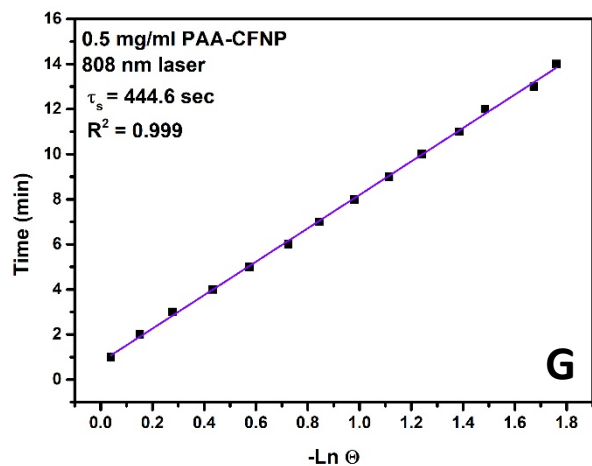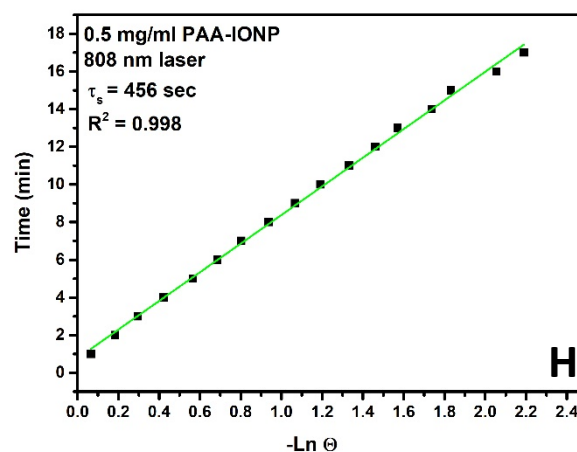



**Figure S6: Photothermal conversion efficiency. (A-B and E-F) PCE calculations using 635 nm and 808 nm. (C-D and G-H) Plot of negative logarithm of cooling period with time (min) to calculate heat dissipation time constant of each sample.**

| S. No. | Nanoparticle | Concentration (mg/ml) | Size (nm) | Amplitude (kA/m) | Frequency (kHz) | SAR (W/g) | ILP (nHm <sup>2</sup> /kg) | Ref.       |
|--------|--------------|-----------------------|-----------|------------------|-----------------|-----------|----------------------------|------------|
| 1.     | PAA-CFNPs    | 0.2                   | 17        | 8.7              | 465.6           | 261.2     | 7.41                       | This study |
|        |              | 0.4                   |           |                  |                 | 174.5     | 4.95                       |            |
|        |              | 0.6                   |           |                  |                 | 69.6      | 1.97                       |            |
|        |              | 0.8                   |           |                  |                 | 60.7      | 1.72                       |            |
| 2.     | PMAO-CFNPs   |                       | 13        | 23.9             | 450             | 297.4     | 1.16                       | 25         |
| 3.     | CFNPs        |                       | 9         | 37.3             | 500             | 609       | 0.88                       | 26         |
| 4.     | CFNPs        |                       | 9.7       | 24.8             | 700             | 577       | 1.34                       | 27         |
| 5.     | PAA-IONPs    | 0.2                   | 18        | 8.7              | 465.6           | 104.5     | 2.96                       | This study |
|        |              | 0.4                   |           |                  |                 | 65.3      | 1.85                       |            |
|        |              | 0.6                   |           |                  |                 | 31.3      | 0.88                       |            |
|        |              | 0.8                   |           |                  |                 | 16.1      | 0.45                       |            |
| 6.     | PMA-IONP     | 0.5                   | 8 ± 3     | 15.3             | 522.5           | 41.0      | 0.3                        | 29         |
| 7.     | PMA-ATA-IONP | 0.5                   | 8 ± 2     | 15.3             | 522.5           | 41.0      | 0.3                        |            |

\*ATA- aminoterephthalic acid

\* PMA- pyromellitic acid

**Table S6: Comparison of SAR and ILP of CFNPs and IONPs at different magnetic field**
